# Supplementary material for: Conferring of Drought and Heat Stress Tolerance in Wheat (Triticum aestivum L.) Genotypes and Their Response to Selenium Nanoparticles Application
Source: MDPI journal article supplement (doi:10.3390/nano13060998), 2023-03-09
Supplement: s1 [file s1]

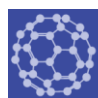

# Conferring of Drought and Heat Stress Tolerance in Wheat (*Triticum aestivum* L.) Genotypes and Their Response to Selenium Nanoparticles Application

Ahmad A. Omar <sup>1,2,\*</sup>, Yasmin M. Heikal <sup>3</sup>, Ehab M. Zayed <sup>4,†</sup>, Sahar A. M. Shamseldin <sup>5</sup>, Yossry E. Salama <sup>6</sup>, Khaled E. Amer <sup>6</sup>, Mostafa M. Basuoni <sup>7</sup>, Sawsan Abd Ellatif <sup>8</sup> and Azza H. Mohamed <sup>2,9,\*</sup>

<sup>1</sup> Biochemistry Department, Faculty of Agriculture, Zagazig University, Zagazig 44519, Egypt

<sup>2</sup> Citrus Research and Education Center, University of Florida, IFAS, Lake Alfred, FL 33850, USA

<sup>3</sup> Botany Department, Faculty of Science, Mansoura University, Mansoura 35516, Egypt

<sup>4</sup> Cell Study Research Department, Field Crops Research Institute, Agricultural Research Center, Giza 12619, Egypt

<sup>5</sup> Botany Department, Women's College for Arts, Science and Education, Ain Shams University, Cairo 11566, Egypt

<sup>6</sup> Crop Science Department, Faculty of Agriculture, Damanshour University, Damanshour 22516, Egypt

<sup>7</sup> Botany and Microbiology Department, Faculty of Science (Boys), Al-Azhar University, Cairo 11884, Egypt

<sup>8</sup> Bioprocess Development Department, Genetic Engineering and Biotechnology Research Institute (GEBRI), City for Scientific Research and Technology Applications, New Borg El-Arab 21934, Egypt

<sup>9</sup> Agricultural Chemistry Department, Faculty of Agriculture, Mansoura University, Mansoura 33516, Egypt

\* Correspondence: omar71@ufl.edu or aaelhanafi@agri.zu.edu.eg (A.A.O.); azza@ufl.edu or azza71@mans.edu.eg (A.H.M.); Tel.: +1-863-521-4569 (A.A.O.); +1-863-521-4886 (A.H.M.); Fax: +1-863-956-4631 (A.A.O. & A.H.M.)

† These authors contributed equally to this work.

**Table S1.** Name, pedigree, selection history, and year of release of the eight wheat genotypes and lines under study.

| Genotypes   | Pedigree                                                                                                 | Selection History                                         | Year of Release |
|-------------|----------------------------------------------------------------------------------------------------------|-----------------------------------------------------------|-----------------|
| Giza-168    | MRL/BUC // SERI                                                                                          | CM93046-8M-0Y-0M-2Y-0B-0SH-0EGY                           | 1999            |
| Giza-171    | SAKHA 93 / GEMMIZA 9                                                                                     | S.6-1GZ-4GZ-1GZ-2GZ-0EGY                                  | 2013            |
| Misir-1     | OASIS / SKAUZ // 4*BCN /3/ 2*PASTOR                                                                      | CMSS00Y01881T-050M-030Y-030M-030WGY-33M-0Y-0EGY           | 2014            |
| Misir-3     | ATTILA*2/PBW65*2/KACHU                                                                                   | CMSS06Y00582T-099TOPM-099Y-099ZTM-099Y-099M-10WGY-0B-0EGY | 2019            |
| Shandweel-1 | SITE / MO /4/ NAC / TH.AC // 3*PVN /3/ MIRLO / BUC                                                       | CMSS93B00567S-72Y-010M-010Y-010M-3Y-0M-0HTY-0SH-0EGY      | 2011            |
| Sids-1      | HD 2172 / Pavon "S" // 1158.57 / Maya 74 "S"                                                             | S 46-4SD-2SD-1SD-0SD-0EGY                                 | 1994            |
| Sids-12     | BUC // 7C / ALD /5/ MAYA74 / ON // 1160.147 /3/ BB / GLL /4/ CHAT"S" /6/ MAYA / VUL // CMH74A.630 / 4*SX | SD7096-4SD-1SD-1SD-0SD-0EGY                               | 2009            |
| Sids-14     | BOW "S" / VEE"S" // BOW"S" / TSI/3/ BANI SEWEF 1                                                         | SD293-1SD-2SD-4SD-0SD-0EGY                                | 2017            |

**Table S2.** List of primers for the four metal-tolerant, phyto-chelating, and Zn transporter genes and the housekeeping gene (reference gene) and their sequences used in qRT-PCR analysis.

| Gene Name                                             | Sequence (5'.....3')                                 |
|-------------------------------------------------------|------------------------------------------------------|
| Aquaporin ( <i>PIP1</i> )                             | F: CTACATGATTGCGCAGTGCC<br>R: GCCGAAGTGAAGTGTGAGA    |
| Late embryogenesis abundant proteins ( <i>LEA-1</i> ) | F: CAGCGAAGTTTGGATGGAATG<br>R: ACCTGTCGCCAATCAGAAGAT |
| Heat shock protein 70 ( <i>HSP 70</i> )               | F: CAAGGGTGAGGACAAGCAGT<br>R: CCTCTGGGAATCATTGAAGTAA |
| Heat shock protein 90 ( <i>HSP 90</i> )               | F: CAAGTCGGACCTCGTCAACA<br>R: GAAACCGACACCAAAGTCC    |
| $\beta$ -Actin                                        | F: GTGCCCATTACGAAGGATA<br>R: GAAGACTCCATGCCGATCAT    |

**Table S3.** Descriptive statistics for morphological traits of eight wheat genotypes grown under control, drought, and heat stress conditions without and with SeNPs foliar application.

| Traits  | Treatments | Minimum | Maximum | Mean  | SD   |
|---------|------------|---------|---------|-------|------|
| PH (cm) | T1         | 35.84   | 49.15   | 42.98 | 4.75 |
|         | T2         | 25.37   | 44.97   | 34.49 | 7.64 |
|         | T3         | 25.80   | 46.18   | 35.23 | 5.89 |
|         | T4         | 39.51   | 51.36   | 45.58 | 4.09 |
|         | T5         | 26.82   | 51.51   | 37.35 | 8.21 |
|         | T6         | 31.61   | 47.31   | 40.12 | 5.58 |
| SFW(g)  | T1         | 3.80    | 4.86    | 4.39  | 0.37 |
|         | T2         | 3.29    | 3.98    | 3.58  | 0.22 |
|         | T3         | 3.53    | 4.16    | 3.77  | 0.21 |
|         | T4         | 4.20    | 5.15    | 4.69  | 0.35 |
|         | T5         | 3.60    | 4.50    | 3.94  | 0.33 |
|         | T6         | 3.67    | 4.65    | 4.20  | 0.34 |
| SDW(g)  | T1         | 1.04    | 1.77    | 1.37  | 0.22 |
|         | T2         | 0.50    | 1.94    | 0.91  | 0.44 |
|         | T3         | 0.62    | 1.07    | 0.93  | 0.15 |
|         | T4         | 1.12    | 1.97    | 1.47  | 0.26 |
|         | T5         | 0.72    | 1.30    | 1.08  | 0.19 |
|         | T6         | 0.87    | 1.39    | 1.18  | 0.17 |
| RFW(g)  | T1         | 1.24    | 4.37    | 2.14  | 1.00 |
|         | T2         | 0.72    | 3.41    | 1.54  | 0.84 |
|         | T3         | 0.73    | 3.50    | 1.64  | 0.87 |
|         | T4         | 1.36    | 2.70    | 2.02  | 0.47 |
|         | T5         | 0.84    | 3.94    | 1.86  | 0.95 |
|         | T6         | 1.12    | 4.21    | 1.99  | 0.99 |
| RDW(g)  | T1         | 0.42    | 1.12    | 0.75  | 0.22 |
|         | T2         | 0.11    | 0.56    | 0.38  | 0.15 |
|         | T3         | 0.20    | 0.70    | 0.46  | 0.16 |
|         | T4         | 0.56    | 1.23    | 0.84  | 0.24 |
|         | T5         | 0.27    | 0.86    | 0.56  | 0.19 |
|         | T6         | 0.33    | 1.02    | 0.64  | 0.22 |

Plant height (PH), shoot fresh weight (SFW), shoot dry weight (SDW), root fresh weight (RFW), and root dry weight (RDW). Treatments: T1 = control (regular irrigation, 100% FC), T2 = drought stress (60% FC), T3 = heat stress (38°C), T4 = 10 mg.L<sup>-1</sup> of SeNPs, T5 = drought stress + 10 mg.L<sup>-1</sup> of SeNPs, and T6 = heat stress + 10 mg.L<sup>-1</sup> of SeNPs.

**Table S4.** Performance of eight wheat genotypes morphological traits grown under control, drought, and heat stress conditions without and with SeNPs foliar application.

| Genotypes    | Treatments | PH            | SFW           | SDW          | RFW          | RDW          |
|--------------|------------|---------------|---------------|--------------|--------------|--------------|
| Giza-168     | T1         | 35.84 ± 0.02b | 4.09 ± 0.01b  | 1.77 ± 0.01b | 1.24 ± 0.01b | 0.94 ± 0.01b |
|              | T2         | 25.84 ± 0.01f | 3.41 ± 0.01f  | 0.90 ± 0.01f | 0.72 ± 0.02f | 0.55 ± 0.01f |
|              | T3         | 26.48 ± 0.01e | 3.53 ± 0.01e  | 1.03 ± 0.02e | 0.79 ± 0.01e | 0.63 ± 0.01e |
|              | T4         | 40.15 ± 0.01a | 5.15 ± 0.01a  | 1.97 ± 0.01a | 1.54 ± 0.01a | 1.11 ± 0.01a |
|              | T5         | 27.63 ± 0.02d | 3.64 ± 0.01d  | 1.18 ± 0.01d | 0.84 ± 0.01d | 0.73 ± 0.01d |
|              | T6         | 31.61 ± 0.02c | 3.97 ± 0.01c  | 1.34 ± 0.01c | 1.12 ± 0.01c | 0.82 ± 0.01c |
| Giza-171     | T1         | 37.69 ± 0.01b | 4.86 ± 0.02b  | 1.33 ± 0.03d | 1.29 ± 0.01f | 1.12 ± 0.01b |
|              | T2         | 25.37 ± 0.01f | 3.49 ± 0.02f  | 1.94 ± 0.01b | 0.95 ± 0.01f | 0.56 ± 0.01f |
|              | T3         | 25.80 ± 0.01e | 3.57 ± 0.01e  | 1.07 ± 0.01f | 0.73 ± 0.59f | 0.70 ± 0.01e |
|              | T4         | 39.51 ± 0.01a | 5.04 ± 0.01a  | 1.50 ± 0.01c | 1.36 ± 0.02f | 1.23 ± 0.02a |
|              | T5         | 26.82 ± 0.01d | 3.63 ± 0.01d  | 1.10 ± 0.01f | 1.15 ± 0.01f | 0.86 ± 0.01d |
|              | T6         | 33.40 ± 0.02c | 4.64 ± 0.02c  | 1.22 ± 0.01e | 1.21 ± 0.01f | 1.02 ± 0.01c |
| Misr-1       | T1         | 43.16 ± 0.01c | 4.08 ± 0.02b  | 1.30 ± 0.01b | 1.96 ± 0.01b | 0.76 ± 0.01c |
|              | T2         | 44.97 ± 0.01b | 3.63 ± 0.01f  | 0.74 ± 0.01f | 1.41 ± 0.02f | 0.39 ± 0.01f |
|              | T3         | 37.74 ± 0.01e | 3.75 ± 0.01e  | 0.98 ± 0.01e | 1.47 ± 0.02e | 0.41 ± 0.01f |
|              | T4         | 46.45 ± 0.01a | 4.20 ± 0.01a  | 1.33 ± 0.02a | 2.05 ± 0.01a | 0.81 ± 0.01b |
|              | T5         | 37.62 ± 0.02f | 3.87 ± 0.03d  | 1.07 ± 0.01d | 1.60 ± 0.01d | 0.54 ± 0.01e |
|              | T6         | 40.49 ± 0.01d | 4.02 ± 0.01c  | 1.15 ± 0.01c | 1.70 ± 0.01c | 0.61 ± 0.01d |
| Misr-3       | T1         | 45.93 ± 0.01b | 4.50 ± 0.02b  | 1.54 ± 0.01b | 2.41 ± 0.01b | 0.80 ± 0.01b |
|              | T2         | 34.45 ± 0.01f | 3.29 ± 0.01f  | 0.74 ± 0.01f | 1.60 ± 0.01f | 0.38 ± 0.01f |
|              | T3         | 36.67 ± 0.02e | 3.71 ± 0.02e  | 0.97 ± 0.02e | 1.75 ± 0.01e | 0.50 ± 0.01e |
|              | T4         | 47.22 ± 0.01a | 4.62 ± 0.01a  | 1.65 ± 0.01a | 2.70 ± 0.01a | 0.82 ± 0.01b |
|              | T5         | 39.39 ± 0.01d | 3.82 ± 0.02d  | 1.30 ± 0.01d | 2.04 ± 0.01d | 0.65 ± 0.01d |
|              | T6         | 41.69 ± 0.01c | 4.19 ± 0.01c  | 1.39 ± 0.01c | 2.19 ± 0.02c | 0.71 ± 0.01c |
| Shandaweel-1 | T1         | 39.82 ± 0.02b | 3.80 ± 0.01c  | 1.42 ± 0.01b | 1.50 ± 0.01b | 0.42 ± 0.02b |
|              | T2         | 29.60 ± 0.01f | 3.45 ± 0.01f  | 0.95 ± 0.01f | 0.96 ± 0.01f | 0.11 ± 0.01f |
|              | T3         | 32.94 ± 0.01e | 3.82 ± 0.01c  | 1.06 ± 0.01e | 1.18 ± 0.01e | 0.20 ± 0.01e |
|              | T4         | 44.12 ± 0.02a | 4.30 ± 0.01b  | 1.55 ± 0.01a | 1.62 ± 0.03a | 0.57 ± 0.01a |
|              | T5         | 34.61 ± 0.01d | 3.60 ± 0.01e  | 1.20 ± 0.01d | 1.32 ± 0.01d | 0.27 ± 0.01d |
|              | T6         | 38.42 ± 0.01c | 3.67 ± 0.01d  | 1.28 ± 0.01c | 1.37 ± 0.01c | 0.33 ± 0.01c |
| Sids-1       | T1         | 47.15 ± 0.01c | 4.62 ± 0.01c  | 1.04 ± 0.01b | 2.17 ± 0.01c | 0.76 ± 0.01b |
|              | T2         | 43.81 ± 0.01f | 3.98 ± 0.01f  | 0.50 ± 0.01f | 1.53 ± 0.01f | 0.42 ± 0.01f |
|              | T3         | 46.18 ± 0.01e | 3.96 ± 0.01f  | 0.62 ± 0.01e | 1.87 ± 0.01e | 0.51 ± 0.02e |
|              | T4         | 48.59 ± 0.08b | 4.74 ± 0.01b  | 1.12 ± 0.01a | 2.20 ± 0.01b | 0.87 ± 0.01a |
|              | T5         | 51.51 ± 0.01a | 4.20 ± 0.01e  | 0.72 ± 0.01d | 2.07 ± 0.01d | 0.61 ± 0.01d |
|              | T6         | 46.52 ± 0.01d | 4.37 ± 0.01d  | 0.87 ± 0.01c | 2.09 ± 0.01d | 0.67 ± 0.01c |
| Sids-12      | T1         | 49.15 ± 0.01b | 4.76 ± 0.01dd | 1.19 ± 0.01b | 4.37 ± 0.01a | 0.70 ± 0.01b |
|              | T2         | 39.50 ± 0.01e | 3.78 ± 0.01f  | 0.72 ± 0.02f | 3.41 ± 0.01e | 0.30 ± 0.01f |
|              | T3         | 31.08 ± 0.01f | 4.16 ± 0.01fb | 0.88 ± 0.01e | 3.50 ± 0.01d | 0.37 ± 0.01e |
|              | T4         | 51.36 ± 0.01a | 4.98 ± 0.01c  | 1.25 ± 0.01a | 2.45 ± 0.01f | 0.74 ± 0.01a |
|              | T5         | 44.66 ± 0.01d | 4.50 ± 0.34ec | 0.98 ± 0.01d | 3.94 ± 0.01c | 0.44 ± 0.01d |
|              | T6         | 47.31 ± 0.01c | 4.65 ± 0.02dd | 1.06 ± 0.01c | 4.21 ± 0.01b | 0.52 ± 0.01c |
| Sids-14      | T1         | 45.12 ± 0.01b | 4.37 ± 0.02b  | 1.33 ± 0.01b | 2.16 ± 0.01b | 0.52 ± 0.01b |
|              | T2         | 32.35 ± 0.01f | 3.59 ± 0.02f  | 0.76 ± 0.01f | 1.74 ± 0.01f | 0.29 ± 0.01f |
|              | T3         | 36.81 ± 0.01d | 3.65 ± 0.01e  | 0.85 ± 0.01e | 1.80 ± 0.01e | 0.34 ± 0.01e |
|              | T4         | 47.20 ± 0.01a | 4.49 ± 0.01a  | 1.40 ± 0.01a | 2.20 ± 0.01a | 0.56 ± 0.01a |
|              | T5         | 36.54 ± 0.01e | 3.89 ± 0.02d  | 0.98 ± 0.01d | 1.89 ± 0.01d | 0.38 ± 0.01d |
|              | T6         | 41.53 ± 0.01c | 4.12 ± 0.01c  | 1.12 ± 0.01c | 2.01 ± 0.02c | 0.44 ± 0.01c |

Plant height (PH), shoot fresh weight (SFW), shoot dry weight (SDW), root fresh weight (RFW), and root dry weight (RDW). Data presented as means ± standard deviation (SD) of three replications ( $n = 3$ ). Different letters indicate statistically significant differences among treatments according to (Tukey's HSD post hoc test) at  $P \leq 0.05$ . Treatments: T1 = control (regular irrigation, 100% FC), T2 = drought stress (60% FC), T3 = heat stress (38°C), T4 = 10 mg.L<sup>-1</sup> of SeNPs, T5 = drought stress + 10 mg.L<sup>-1</sup> of SeNPs, and T6 = heat stress + 10 mg.L<sup>-1</sup> of SeNPs.

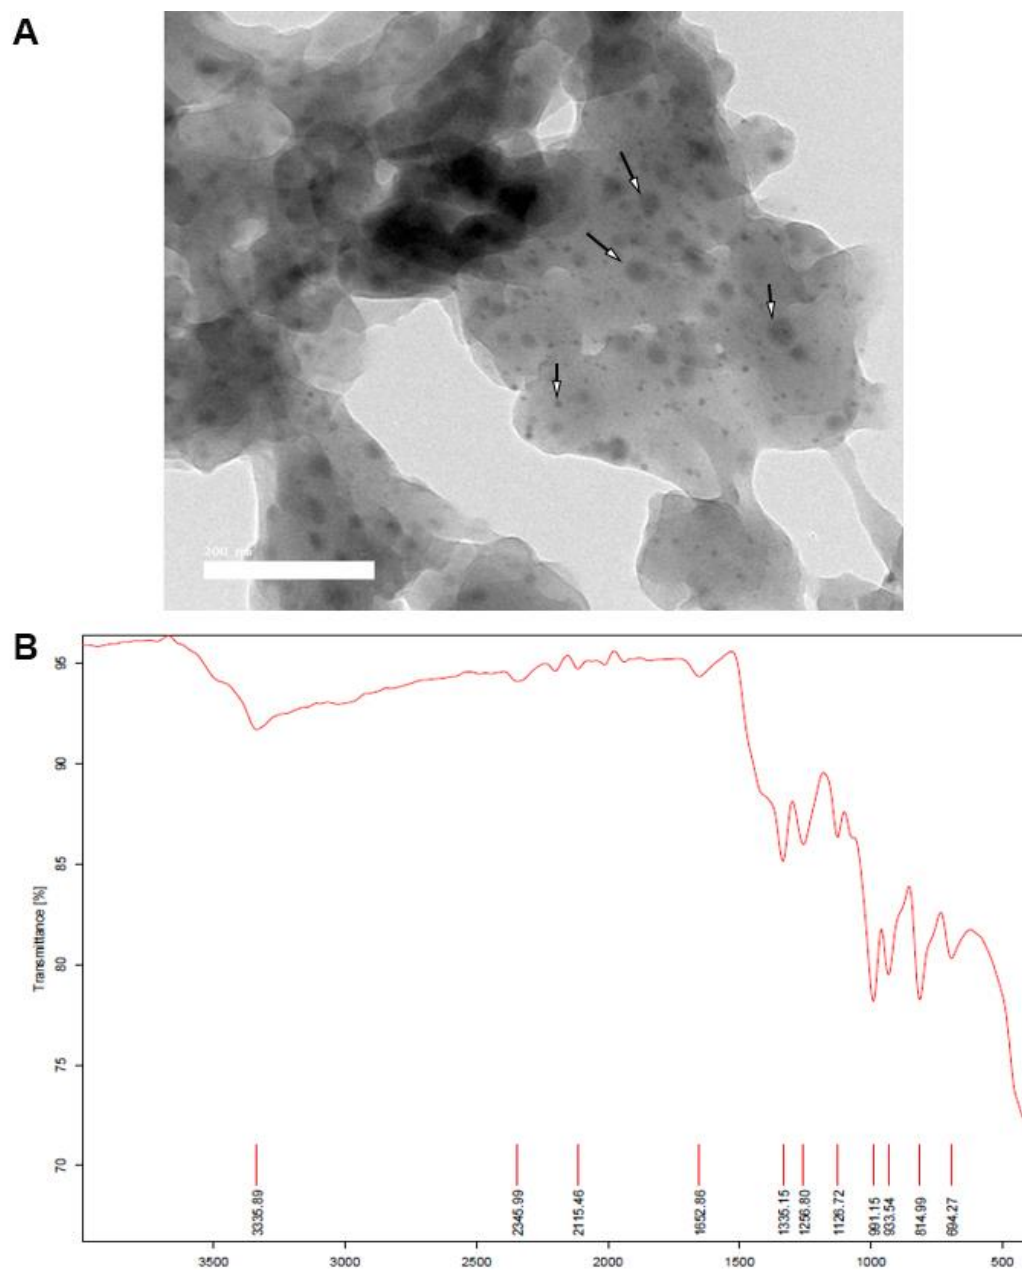

**Figure S1.** Characterization of SeNPs: (A) Transmission electron microscopy (TEM) microphotography of SeNPs; (B) Fourier transform infrared (FTIR) spectrum showing different potential functional groups responsible to stabilize or cap SeNPs. Arrows indicate different SeNPs sizes.

**Table S5.** Total chlorophyll, photosynthetic rate, stomatal conductance, transpiration rate, electrolyte leakage, and leaf water potential of eight wheat genotypes under drought and heat stresses without and with SeNPs foliar application.

| Genotypes                                                                                 | Treatments | Giza-168      | Giza-171      | Misr-1        | Misr-3        | Shandaweel-1  | Sids-1        | Sids-12       | Sids-14       |
|-------------------------------------------------------------------------------------------|------------|---------------|---------------|---------------|---------------|---------------|---------------|---------------|---------------|
| <b>Total chlorophyll (CHLO)</b><br>(mg/g. FW)                                             | T1         | 3.08 ± 0.01b  | 2.95 ± 0.01b  | 3.51 ± 0.01b  | 3.61 ± 0.01b  | 3.19 ± 0.01b  | 2.63 ± 0.01e  | 2.72 ± 0.01e  | 3.39 ± 0.01c  |
|                                                                                           | T2         | 1.64 ± 0.01f  | 1.56 ± 0.02f  | 2.29 ± 0.01f  | 2.18 ± 0.01f  | 1.81 ± 0.01f  | 2.30 ± 0.01f  | 2.45 ± 0.01f  | 1.93 ± 0.01f  |
|                                                                                           | T3         | 1.95 ± 0.01e  | 1.84 ± 0.01e  | 2.40 ± 0.01e  | 2.55 ± 0.01e  | 2.11 ± 0.01e  | 2.70 ± 0.01d  | 2.90 ± 0.01d  | 2.30 ± 0.01e  |
|                                                                                           | T4         | 3.15 ± 0.01a  | 3.05 ± 0.02a  | 3.61 ± 0.01a  | 3.76 ± 0.01a  | 3.37 ± 0.01a  | 3.95 ± 0.01a  | 4.12 ± 0.02a  | 3.53 ± 0.01b  |
|                                                                                           | T5         | 2.65 ± 0.01d  | 2.43 ± 0.02d  | 3.07 ± 0.01d  | 3.13 ± 0.02d  | 2.85 ± 0.01d  | 3.20 ± 0.01c  | 3.35 ± 0.01b  | 2.96 ± 0.01d  |
|                                                                                           | T6         | 2.74 ± 0.01c  | 2.55 ± 0.01c  | 3.22 ± 0.01c  | 3.34 ± 0.01c  | 2.94 ± 0.01c  | 3.45 ± 0.01b  | 3.20 ± 0.01c  | 2.95 ± 0.01d  |
| <b>Photosynthetic rate (PN)</b><br>( $\mu\text{mol (CO}_2\text{) m}^{-2}\text{ s}^{-1}$ ) | T1         | 6.17 ± 0.01b  | 6.01 ± 0.02b  | 6.51 ± 0.01c  | 6.63 ± 0.01b  | 6.34 ± 0.01b  | 6.71 ± 0.01b  | 6.82 ± 0.02c  | 6.49 ± 0.01b  |
|                                                                                           | T2         | 4.87 ± 0.01f  | 4.80 ± 0.01f  | 5.21 ± 0.01f  | 5.31 ± 0.01f  | 5.06 ± 0.01f  | 5.42 ± 0.02f  | 5.52 ± 0.02f  | 5.12 ± 0.01e  |
|                                                                                           | T3         | 5.02 ± 0.01e  | 5.02 ± 0.01e  | 5.43 ± 0.01e  | 5.54 ± 0.01e  | 5.20 ± 0.01e  | 5.63 ± 0.01e  | 5.72 ± 0.01e  | 5.32 ± 0.01d  |
|                                                                                           | T4         | 6.27 ± 0.01a  | 6.12 ± 0.01a  | 6.81 ± 0.07b  | 6.70 ± 0.01a  | 6.40 ± 0.01a  | 6.84 ± 0.01a  | 6.98 ± 0.01b  | 6.53 ± 0.01a  |
|                                                                                           | T5         | 5.95 ± 0.01d  | 5.72 ± 0.01d  | 6.40 ± 0.01d  | 6.46 ± 0.02d  | 6.10 ± 0.01d  | 6.50 ± 0.01d  | 6.71 ± 0.01d  | 6.18 ± 0.01c  |
|                                                                                           | T6         | 6.03 ± 0.01c  | 6.03 ± 0.01c  | 6.42 ± 0.01d  | 6.52 ± 0.01c  | 6.15 ± 0.01c  | 6.63 ± 0.01c  | 6.73 ± 0.02d  | 6.25 ± 0.01f  |
| <b>Stomatal conductance (SC)</b><br>( $\text{mmol H}_2\text{O m}^{-2}\text{s}^{-2}$ )     | T1         | 27.34 ± 0.01b | 26.91 ± 0.01b | 27.81 ± 0.01b | 28.09 ± 0.02b | 27.61 ± 0.01b | 28.12 ± 0.01b | 28.30 ± 0.01b | 27.72 ± 0.02b |
|                                                                                           | T2         | 17.74 ± 0.01d | 17.65 ± 0.01d | 11.26 ± 0.02f | 18.60 ± 0.19d | 17.96 ± 0.02d | 18.61 ± 0.01d | 12.71 ± 0.02f | 18.12 ± 0.02d |
|                                                                                           | T3         | 16.81 ± 0.01e | 16.51 ± 0.01e | 17.19 ± 0.01d | 17.33 ± 0.01e | 16.86 ± 0.02e | 17.51 ± 0.02e | 18.01 ± 0.02d | 17.04 ± 0.01e |
|                                                                                           | T4         | 28.80 ± 0.01a | 28.61 ± 0.01a | 29.45 ± 0.01a | 29.61 ± 0.01a | 29.08 ± 0.02a | 29.01 ± 0.02a | 31.61 ± 0.01a | 29.30 ± 0.02a |
|                                                                                           | T5         | 13.71 ± 0.01f | 13.59 ± 0.01f | 14.21 ± 0.01e | 14.30 ± 0.01f | 13.94 ± 0.01f | 19.91 ± 0.01f | 14.51 ± 0.01e | 14.12 ± 0.02f |
|                                                                                           | T6         | 18.92 ± 0.02c | 18.82 ± 0.02c | 19.60 ± 0.02c | 19.76 ± 0.01c | 13.94 ± 0.01c | 19.91 ± 0.01c | 20.30 ± 0.02c | 19.33 ± 0.01c |
| <b>Transpiration rate (TR)</b><br>( $\text{mmol H}_2\text{O m}^{-2}\text{s}^{-2}$ )       | T1         | 0.73 ± 0.01c  | 0.77 ± 0.00c  | 0.80 ± 0.01c  | 0.81 ± 0.01c  | 0.75 ± 0.02d  | 0.80 ± 0.01c  | 0.81 ± 0.01d  | 0.76 ± 0.01c  |
|                                                                                           | T2         | 0.60 ± 0.02d  | 0.61 ± 0.01ec | 0.70 ± 0.01d  | 0.71 ± 0.01d  | 0.65 ± 0.01e  | 0.75 ± 0.01d  | 0.79 ± 0.02d  | 0.67 ± 0.01d  |
|                                                                                           | T3         | 0.55 ± 0.01e  | 0.59 ± 0.01e  | 0.68 ± 0.02d  | 0.7 ± 0.01d   | 0.62 ± 0.01e  | 0.73 ± 0.01d  | 0.74 ± 0.01e  | 0.66 ± 0.01d  |
|                                                                                           | T4         | 0.75 ± 0.01c  | 0.80 ± 0.01b  | 0.84 ± 0.01d  | 0.82 ± 0.01c  | 0.78 ± 0.02d  | 0.88 ± 0.01b  | 0.90 ± 0.01c  | 0.80 ± 0.01b  |
|                                                                                           | T5         | 0.47 ± 0.01f  | 0.51 ± 0.01f  | 0.51 ± 0.01f  | 0.54 ± 0.01f  | 0.52 ± 0.01f  | 0.52 ± 0.01f  | 0.68 ± 0.02f  | 0.49 ± 0.01f  |
|                                                                                           | T6         | 0.59 ± 0.01d  | 0.62 ± 0.01d  | 0.61 ± 0.01e  | 0.65 ± 0.01e  | 0.62 ± 0.01e  | 0.69 ± 0.01e  | 0.70 ± 0.02f  | 0.62 ± 0.01e  |
| <b>Electrolyte Leakage (EL) (%)</b>                                                       | T1         | 37.75 ± 0.01e | 37.51 ± 0.01d | 38.44 ± 0.01e | 39.19 ± 0.01e | 37.95 ± 0.01e | 39.41 ± 0.01f | 39.61 ± 0.01e | 39.24 ± 0.02e |
|                                                                                           | T2         | 74.51 ± 0.01a | 74.72 ± 0.02a | 73.74 ± 0.01a | 73.54 ± 0.02a | 74.07 ± 0.01a | 73.35 ± 0.01a | 73.15 ± 0.01a | 73.91 ± 0.01a |
|                                                                                           | T3         | 57.13 ± 0.01d | 37.30 ± 0.01f | 56.72 ± 0.02d | 65.60 ± 0.01c | 56.91 ± 0.01d | 65.41 ± 0.01b | 65.22 ± 0.01b | 56.81 ± 0.01d |
|                                                                                           | T4         | 23.90 ± 0.01f | 33.62 ± 0.02e | 34.80 ± 0.02f | 35.04 ± 0.02f | 34.55 ± 0.02f | 63.43 ± 0.02c | 39.51 ± 0.01f | 34.63 ± 0.02f |
|                                                                                           | T5         | 57.91 ± 0.01c | 58.16 ± 0.01c | 57.69 ± 0.03c | 71.19 ± 0.01b | 57.84 ± 0.01c | 57.40 ± 0.01e | 57.61 ± 0.01d | 57.74 ± 0.01c |
|                                                                                           | T6         | 63.12 ± 0.02b | 63.30 ± 0.01b | 62.65 ± 0.01b | 62.45 ± 0.01d | 62.77 ± 0.02b | 62.31 ± 0.01d | 62.14 ± 0.01c | 62.80 ± 0.01b |

|                                  |    |              |               |              |               |               |              |              |              |
|----------------------------------|----|--------------|---------------|--------------|---------------|---------------|--------------|--------------|--------------|
| Leaf water potential (LWP) (MPa) | T1 | 0.37 ± 0.01e | 0.37 ± 0.01f  | 0.33 ± 0.02e | 0.31 ± 0.01e  | 0.35 ± 0.01f  | 0.32 ± 0.02e | 0.32 ± 0.01e | 0.21 ± 0.02f |
|                                  | T2 | 1.02 ± 0.01d | 1.05 ± 0.01ec | 1.12 ± 0.01b | 0.15 ± 0.11f  | 1.15 ± 0.01ec | 1.05 ± 0.03c | 1.03 ± 0.02b | 1.11 ± 0.02c |
|                                  | T3 | 1.00 ± 0.01d | 1.03 ± 0.02e  | 1.04 ± 0.01d | 1.03 ± 0.01d  | 1.11 ± 0.01e  | 0.96 ± 0.02d | 0.92 ± 0.02d | 1.05 ± 0.02d |
|                                  | T4 | 0.34 ± 0.01f | 0.35 ± 0.01f  | 0.28 ± 0.01f | 0.25 ± 0.01fb | 0.32 ± 0.02f  | 0.26 ± 0.01f | 0.25 ± 0.01f | 0.28 ± 0.01e |
|                                  | T5 | 1.05 ± 0.01c | 1.08 ± 0.01d  | 1.18 ± 0.01a | 1.14 ± 0.01d  | 1.18 ± 0.06d  | 1.12 ± 0.01b | 1.11 ± 0.02a | 1.20 ± 0.01b |
|                                  | T6 | 1.05 ± 0.01c | 1.12 ± 0.02c  | 1.08 ± 0.01c | 1.06 ± 0.02d  | 1.14 ± 0.01ec | 0.98 ± 0.01d | 0.97 ± 0.01c | 1.18 ± 0.01b |

Data presented as means ± standard deviation (SD) of three replications ( $n = 3$ ). Different letters indicate statistically significant differences among treatments according to (Tukey's HSD post hoc test) at  $P \leq 0.05$ . Treatments: T1 = control (regular irrigation, 100% FC), T2 = drought stress (60% FC), T3 = heat stress (38°C), T4 = 10 mg.L<sup>-1</sup> of SeNPs, T5 = drought stress + 10 mg.L<sup>-1</sup> of SeNPs, and T6 = heat stress + 10 mg.L<sup>-1</sup> of SeNPs.

**Table S6.** Changes in malondialdehyde (MDA), hydrogen peroxide (H<sub>2</sub>O<sub>2</sub>), proline contents, and in vivo changes in antioxidant enzyme activity, superoxide dismutase (SOD), ascorbate peroxidase (APX), and catalase (CAT), of eight wheat genotypes under drought and heat stresses without and with SeNPs foliar application.

| Genotypes | Treatments | MDA (μmol.g <sup>-1</sup> FW) | H <sub>2</sub> O <sub>2</sub> (μmol.g <sup>-1</sup> FW) | Proline (μmol g <sup>-1</sup> FW) | SOD (U.g <sup>-1</sup> FW. min <sup>-1</sup> ) | APX (μmol AsA g <sup>-1</sup> . FW. min <sup>-1</sup> ) | CAT (μmol H <sub>2</sub> O <sub>2</sub> g <sup>-1</sup> . FW. min <sup>-1</sup> ) |
|-----------|------------|-------------------------------|---------------------------------------------------------|-----------------------------------|------------------------------------------------|---------------------------------------------------------|-----------------------------------------------------------------------------------|
| Giza-168  | T1         | 2.54 ± 0.01f                  | 2.05 ± 0.01e                                            | 1.80 ± 0.01e                      | 145.67 ± 0.06f                                 | 71.17 ± 0.06f                                           | 26.17 ± 0.06f                                                                     |
|           | T2         | 9.12 ± 0.01d                  | 3.41 ± 0.01b                                            | 2.63 ± 0.01d                      | 361.43 ± 0.06b                                 | 129.57 ± 0.06b                                          | 62.13 ± 0.06b                                                                     |
|           | T3         | 9.26 ± 0.01b                  | 3.28 ± 0.01c                                            | 2.71 ± 0.01c                      | 358.63 ± 1.76c                                 | 128.57 ± 0.06d                                          | 53.13 ± 0.06d                                                                     |
|           | T4         | 2.65 ± 0.01e                  | 1.78 ± 0.01f                                            | 1.24 ± 0.58f                      | 152.30 ± 0.00e                                 | 74.17 ± 0.06e                                           | 26.77 ± 0.06e                                                                     |
|           | T5         | 9.22 ± 0.01c                  | 3.15 ± 0.01d                                            | 2.74 ± 0.01b                      | 331.40 ± 0.10d                                 | 131.20 ± 0.10a                                          | 63.17 ± 0.06a                                                                     |
|           | T6         | 9.35 ± 0.02a                  | 4.00 ± 0.02a                                            | 2.86 ± 0.02a                      | 369.77 ± 0.06a                                 | 129.73 ± 0.06c                                          | 54.57 ± 0.06c                                                                     |
| Giza-171  | T1         | 2.60 ± 0.01f                  | 2.11 ± 0.01d                                            | 1.85 ± 0.01b                      | 148.80 ± 0.10f                                 | 73.43 ± 0.06e                                           | 26.83 ± 0.06e                                                                     |
|           | T2         | 9.31 ± 0.02b                  | 3.55 ± 0.01a                                            | 2.69 ± 0.01a                      | 362.73 ± 0.06c                                 | 136.33 ± 1.79b                                          | 63.40 ± 0.10b                                                                     |
|           | T3         | 9.29 ± 0.01d                  | 3.42 ± 0.01b                                            | 2.69 ± 0.01a                      | 360.03 ± 0.06d                                 | 131.13 ± 0.06d                                          | 55.50 ± 0.10c                                                                     |
|           | T4         | 2.71 ± 0.01e                  | 1.80 ± 0.01e                                            | 1.28 ± 0.59b                      | 156.23 ± 0.06e                                 | 72.50 ± 0.10f                                           | 28.10 ± 0.10d                                                                     |
|           | T5         | 9.42 ± 0.01a                  | 0.25 ± 0.01f                                            | 2.76 ± 0.01a                      | 378.50 ± 0.10a                                 | 137.57 ± 0.06a                                          | 64.70 ± 0.10a                                                                     |
|           | T6         | 9.37 ± 0.01c                  | 3.12 ± 0.01c                                            | 2.91 ± 0.01a                      | 374.33 ± 0.06b                                 | 133.73 ± 0.06c                                          | 55.50 ± 0.10c                                                                     |
| Misr-1    | T1         | 2.87 ± 0.01f                  | 1.68 ± 0.01e                                            | 1.63 ± 0.01f                      | 178.50 ± 0.61f                                 | 57.77 ± 0.06f                                           | 27.13 ± 0.06e                                                                     |
|           | T2         | 7.07 ± 0.01c                  | 3.20 ± 0.02a                                            | 2.28 ± 0.02c                      | 370.77 ± 0.06c                                 | 123.60 ± 0.10b                                          | 51.23 ± 0.06b                                                                     |
|           | T3         | 6.71 ± 0.01d                  | 3.12 ± 0.02b                                            | 2.30 ± 0.01b                      | 363.13 ± 0.06d                                 | 115.40 ± 0.10d                                          | 51.23 ± 0.06b                                                                     |
|           | T4         | 2.91 ± 0.01e                  | 1.52 ± 0.02f                                            | 1.80 ± 0.01e                      | 184.17 ± 0.06e                                 | 58.17 ± 0.06e                                           | 28.87 ± 0.06d                                                                     |
|           | T5         | 7.34 ± 0.02b                  | 3.08 ± 0.01c                                            | 2.17 ± 0.01d                      | 389.13 ± 0.06a                                 | 125.20 ± 0.10a                                          | 55.17 ± 0.06a                                                                     |
|           | T6         | 7.86 ± 0.02a                  | 2.81 ± 0.01d                                            | 2.33 ± 0.02a                      | 371.40 ± 0.10b                                 | 116.07 ± 0.06c                                          | 50.60 ± 0.10b                                                                     |
| Misr-3    | T1         | 2.74 ± 0.02e                  | 1.65 ± 0.01e                                            | 1.61 ± 0.01d                      | 171.20 ± 0.10f                                 | 57.33 ± 0.06f                                           | 27.07 ± 0.06f                                                                     |
|           | T2         | 6.97 ± 0.01b                  | 3.19 ± 0.01a                                            | 2.21 ± 0.01b                      | 365.13 ± 0.06c                                 | 119.43 ± 0.06b                                          | 50.87 ± 0.06c                                                                     |

|              |    |              |              |              |                 |                |               |
|--------------|----|--------------|--------------|--------------|-----------------|----------------|---------------|
| Shandaweel-1 | T3 | 6.50 ± 0.01c | 3.06 ± 0.02b | 2.19 ± 0.01b | 360.47 ± 0.06d  | 112.53 ± 0.06d | 43.30 ± 0.10d |
|              | T4 | 2.82 ± 0.02d | 1.53 ± 0.01f | 1.75 ± 0.01c | 180.10 ± 0.10e  | 58.13 ± 0.06e  | 28.17 ± 0.06e |
|              | T5 | 7.12 ± 0.01a | 3.02 ± 0.01c | 2.15 ± 0.01d | 386.07 ± 0.06a  | 124.87 ± 0.06a | 51.17 ± 0.06a |
|              | T6 | 6.51 ± 0.02c | 2.76 ± 0.02d | 2.30 ± 0.01a | 369.37 ± 0.06b  | 115.63 ± 0.06c | 43.53 ± 0.06c |
|              | T1 | 4.05 ± 0.01e | 1.90 ± 0.01e | 1.31 ± 0.01f | 187.17 ± 0.06e  | 69.50 ± 0.10e  | 28.67 ± 0.06e |
|              | T2 | 8.05 ± 0.01c | 3.31 ± 0.01a | 2.15 ± 0.01d | 373.40 ± 0.10c  | 137.13 ± 0.06b | 50.77 ± 0.06b |
| Sids-1       | T3 | 7.62 ± 0.01d | 3.19 ± 0.01b | 2.19 ± 0.01c | 371.53 ± 0.06d  | 125.13 ± 0.06d | 49.27 ± 0.06c |
|              | T4 | 3.19 ± 0.01f | 1.63 ± 0.02f | 1.42 ± 0.01e | 178.17 ± 11.55e | 70.13 ± 0.06e  | 29.83 ± 0.06d |
|              | T5 | 8.41 ± 0.01b | 3.11 ± 0.01c | 2.25 ± 0.01b | 398.03 ± 0.06a  | 136.07 ± 0.06c | 53.17 ± 0.06a |
|              | T6 | 8.8 ± 0.01a  | 2.90 ± 0.02d | 2.30 ± 0.01a | 378.37 ± 0.06b  | 173.43 ± 0.06a | 50.87 ± 0.06b |
|              | T1 | 2.7 ± 0.01e  | 1.61 ± 0.01e | 1.35 ± 0.01f | 186.33 ± 0.06f  | 66.17 ± 0.06e  | 28.50 ± 0.10f |
|              | T2 | 6.85 ± 0.01b | 3.16 ± 0.01a | 2.05 ± 0.01c | 371.70 ± 0.10b  | 121.47 ± 0.06b | 52.40 ± 0.10b |
| Sids-12      | T3 | 6.32 ± 0.01d | 3.06 ± 0.01b | 2.14 ± 0.01b | 369.47 ± 0.06c  | 114.53 ± 0.06c | 42.63 ± 0.06d |
|              | T4 | 2.71 ± 0.01e | 1.49 ± 0.01f | 1.49 ± 0.01e | 192.90 ± 0.52e  | 65.07 ± 0.06f  | 29.13 ± 0.06e |
|              | T5 | 6.93 ± 0.01a | 2.91 ± 0.01c | 1.95 ± 0.01d | 405.13 ± 0.06a  | 121.77 ± 0.06a | 54.20 ± 0.10a |
|              | T6 | 6.51 ± 0.01c | 2.72 ± 0.01d | 2.15 ± 0.01a | 338.33 ± 0.06d  | 113.87 ± 0.06d | 45.63 ± 0.06c |
|              | T1 | 2.61 ± 0.02f | 1.57 ± 0.01e | 1.35 ± 0.01e | 187.53 ± 0.06f  | 66.07 ± 0.06e  | 29.30 ± 0.61e |
|              | T2 | 6.75 ± 0.01b | 3.12 ± 0.01a | 2.04 ± 0.01b | 370.47 ± 0.06c  | 121.27 ± 0.06b | 51.30 ± 0.10b |
| Sids-14      | T3 | 6.21 ± 0.01d | 2.91 ± 0.01b | 2.14 ± 0.02a | 365.57 ± 0.06d  | 111.07 ± 0.06c | 43.50 ± 0.10d |
|              | T4 | 2.71 ± 0.01e | 1.41 ± 0.01f | 1.41 ± 0.01d | 196.43 ± 0.06e  | 69.47 ± 0.06e  | 29.30 ± 0.10e |
|              | T5 | 6.87 ± 0.01a | 2.89 ± 0.01c | 1.94 ± 0.01c | 395.57 ± 0.06a  | 123.17 ± 0.06a | 53.13 ± 0.06a |
|              | T6 | 6.41 ± 0.01c | 2.67 ± 0.01d | 2.04 ± 0.02b | 371.07 ± 0.06b  | 111.33 ± 0.06c | 45.37 ± 0.21c |
|              | T1 | 2.85 ± 0.01f | 0.77 ± 0.01f | 1.41 ± 0.02e | 175.23 ± 0.06f  | 67.07 ± 0.06e  | 28.67 ± 0.06f |
|              | T2 | 7.18 ± 0.01c | 3.24 ± 0.01a | 2.11 ± 0.01d | 381.43 ± 0.06b  | 123.57 ± 0.06b | 52.27 ± 2.80b |
| Sids-14      | T3 | 6.92 ± 0.01d | 3.15 ± 0.01b | 2.16 ± 0.01c | 374.17 ± 0.06d  | 115.40 ± 0.10c | 49.20 ± 0.10d |
|              | T4 | 2.91 ± 0.01e | 1.57 ± 0.03e | 1.21 ± 0.59f | 179.17 ± 0.06e  | 68.23 ± 0.06e  | 29.90 ± 0.10e |
|              | T5 | 7.53 ± 0.03b | 3.11 ± 0.01c | 2.20 ± 0.01b | 396.47 ± 0.06a  | 125.20 ± 0.10a | 57.13 ± 0.06a |
|              | T6 | 7.99 ± 0.02a | 2.86 ± 0.02d | 2.27 ± 0.01a | 376.13 ± 0.06c  | 115.13 ± 0.06c | 50.80 ± 0.10c |

Data presented as means ± standard deviation (SD) of three replications (n = 3). Different letters indicate statistically significant differences among treatments according to (Tukey's HSD post hoc test) at  $P \leq 0.05$ . Abbreviations: MDA—malondialdehyde,  $H_2O_2$ —hydrogen peroxide, SOD—superoxide dismutase, APX—ascorbate peroxidase, AsA—ascorbate, and CAT—catalase. Treatments: T1, control (regular irrigation, 100% Field Capacity (FC)) at (day/night) temperature of  $23/17 \pm 3^\circ\text{C}$ ; T2, drought stress (60% FC); T3, heat stress ( $38^\circ\text{C}$ ); T4,  $10 \text{ mg.L}^{-1}$  of SeNPs; T5, drought stress (60% FC) +  $10 \text{ mg.L}^{-1}$  of SeNPs; and T6, heat stress ( $38^\circ\text{C}$ ) +  $10 \text{ mg.L}^{-1}$  of SeNPs.

**Table S7.** Analysis of variance for the morpho-physiological and biochemical parameters across the main factors: eight studied wheat genotypes, condition, and their interaction.

| Parameters           | Variable and Source of Variation | df | MS       | F        | P     |
|----------------------|----------------------------------|----|----------|----------|-------|
| PH                   | Intercept                        | 1  | 220384.9 | 431.947  | 0     |
|                      | Genotypes                        | 7  | 583.912  | 21.274   | 0     |
|                      | Condition                        | 5  | 510.212  | 18.589   | 0     |
|                      | Genotypes × Condition            | 35 | 27.447   | 1.12E+05 | 0     |
| SFW                  | Intercept                        | 1  | 2404.268 | 577.84   | 0     |
|                      | Genotypes                        | 7  | 0.927    | 6.076    | 0     |
|                      | Condition                        | 5  | 4.161    | 27.287   | 0     |
|                      | Genotypes × Condition            | 35 | 0.152    | 58.383   | 0     |
| SDW                  | Intercept                        | 1  | 191.546  | 150.828  | 0     |
|                      | Genotypes                        | 7  | 0.653    | 6.199    | 0     |
|                      | Condition                        | 5  | 1.27     | 12.058   | 0     |
|                      | Genotypes × Condition            | 35 | 0.105    | 924.787  | 0     |
| RFW                  | Intercept                        | 1  | 499.522  | 385.317  | 0     |
|                      | Genotypes                        | 7  | 12.401   | 48.112   | 0     |
|                      | Condition                        | 5  | 1.296    | 5.03     | 0.001 |
|                      | Genotypes × Condition            | 35 | 0.258    | 35.411   | 0     |
| RDW                  | Intercept                        | 1  | 52.478   | 70.85    | 0     |
|                      | Genotypes                        | 7  | 0.672    | 88.347   | 0     |
|                      | Condition                        | 5  | 0.741    | 97.325   | 0     |
|                      | Genotypes × Condition            | 35 | 0.008    | 75.063   | 0     |
| Total chlorophyll    | Intercept                        | 1  | 1165.255 | 152.537  | 0     |
|                      | Genotypes                        | 7  | 1.34     | 8.891    | 0     |
|                      | Condition                        | 5  | 7.639    | 50.669   | 0     |
|                      | Genotypes × Condition            | 35 | 0.151    | 1.47E+03 | 0     |
| Photosynthetic rate  | Intercept                        | 1  | 5078.106 | 602.243  | 0     |
|                      | Genotypes                        | 7  | 2.632    | 2.536    | 0.032 |
|                      | Condition                        | 5  | 8.432    | 8.126    | 0     |
|                      | Genotypes × Condition            | 35 | 1.038    | 4.71E+03 | 0     |
| Stomatal conductance | Intercept                        | 1  | 60743.76 | 59.663   | 0.001 |
|                      | Genotypes                        | 7  | 17.197   | 0.896    | 0.52  |
|                      | Condition                        | 5  | 1018.112 | 53.065   | 0     |
|                      | Genotypes × Condition            | 35 | 19.186   | 2.22E+04 | 0     |
| Transpiration rate   | Intercept                        | 1  | 67.596   | 258.079  | 0     |
|                      | Genotypes                        | 7  | 0.044    | 20.041   | 0     |
|                      | Condition                        | 5  | 0.262    | 120.458  | 0     |
|                      | Genotypes × Condition            | 35 | 0.002    | 17.017   | 0     |
| Electrolyte leakage  | Intercept                        | 1  | 425024.7 | 87.674   | 0     |
|                      | Genotypes                        | 7  | 328.582  | 1.317    | 0.272 |
|                      | Condition                        | 5  | 4847.786 | 19.431   | 0     |
|                      | Genotypes × Condition            | 35 | 249.493  | 1.61E+06 | 0     |
| Leaf water potential | Intercept                        | 1  | 91.904   | 25.703   | 0.004 |
|                      | Genotypes                        | 7  | 0.092    | 1.367    | 0.25  |
|                      | Condition                        | 5  | 3.576    | 53.363   | 0     |



|                                   |                       |    |          |          |       |
|-----------------------------------|-----------------------|----|----------|----------|-------|
|                                   | Genotypes × Condition | 35 | 0.067    | 510.512  | 0     |
| <b>Malondialdehyde (MDA)</b>      | Intercept             | 1  | 5305.059 | 35.323   | 0.002 |
|                                   | Genotypes             | 7  | 10.493   | 8.348    | 0     |
|                                   | Condition             | 5  | 150.188  | 119.48   | 0     |
|                                   | Genotypes × Condition | 35 | 1.257    | 19.088   | 0     |
| <b>Hydrogen peroxide (H2O2)</b>   | Intercept             | 1  | 942.644  | 70.649   | 0     |
|                                   | Genotypes             | 7  | 0.592    | 0.817    | 0.58  |
|                                   | Condition             | 5  | 13.343   | 18.422   | 0     |
|                                   | Genotypes × Condition | 35 | 0.724    | 5.58E+03 | 0     |
| <b>Proline</b>                    | Intercept             | 1  | 600.985  | 136.777  | 0     |
|                                   | Genotypes             | 7  | 0.819    | 8.515    | 0     |
|                                   | Condition             | 5  | 4.394    | 45.688   | 0     |
|                                   | Genotypes × Condition | 35 | 0.096    | 4.5      | 0     |
| <b>Superoxide dismutase (SOD)</b> | Intercept             | 1  | 1.24E+07 | 59.732   | 0.001 |
|                                   | Genotypes             | 7  | 15478.93 | 0.999    | 0.449 |
|                                   | Condition             | 5  | 208291.3 | 13.439   | 0     |
|                                   | Genotypes × Condition | 35 | 15498.67 | 5.42E+03 | 0     |
| <b>Ascorbate peroxidase (APX)</b> | Intercept             | 1  | 1540371  | 73.024   | 0     |
|                                   | Genotypes             | 7  | 2161.71  | 2.557    | 0.031 |
|                                   | Condition             | 5  | 21094.05 | 24.948   | 0     |
|                                   | Genotypes × Condition | 35 | 845.523  | 1.19E+04 | 0     |
| <b>Catalase (CAT)</b>             | Intercept             | 1  | 280026.2 | 72.787   | 0     |
|                                   | Genotypes             | 7  | 150.89   | 5.339    | 0     |
|                                   | Condition             | 5  | 3847.205 | 136.12   | 0     |
|                                   | Genotypes × Condition | 35 | 28.263   | 158.857  | 0     |

Plant height (PH), shoot fresh weight (SFW), shoot dry weight (SDW), root fresh weight (RFW), and root dry weight (RDW). df—degree of freedom, MS—mean square, F—F statistics, P—probability level.

**Table S8.** Correlation of morpho-physiological traits of eight wheat genotypes under drought conditions.

|                               | PH       | SFW      | RFW      | SDW      | RDW      | CHLO     | PN       | SC       | TR       | EL       | LWP      | MDA      | H <sub>2</sub> O <sub>2</sub> | PRO      | SOD      | APX      | CAT      |
|-------------------------------|----------|----------|----------|----------|----------|----------|----------|----------|----------|----------|----------|----------|-------------------------------|----------|----------|----------|----------|
| PH                            | 1.00000  | 0.69562  | 0.50914  | -0.66821 | -0.19443 | 0.91843  | 0.82468  | -0.59521 | 0.83952  | -0.82643 | 0.01796  | -0.84326 | -0.82515                      | -0.67008 | 0.36228  | -0.68777 | -0.71293 |
| SFW                           | 0.69562  | 1.00000  | 0.47668  | -0.38372 | -0.04365 | 0.58339  | 0.59590  | -0.19539 | 0.65266  | -0.56510 | 0.49095  | -0.49244 | -0.49041                      | -0.51498 | 0.39713  | -0.27655 | -0.37167 |
| RFW                           | 0.50914  | 0.47668  | 1.00000  | -0.38677 | -0.30150 | 0.75144  | 0.78837  | -0.20598 | 0.83453  | -0.77453 | -0.05833 | -0.68140 | -0.69091                      | -0.63081 | 0.31770  | -0.50317 | -0.60882 |
| SDW                           | -0.66821 | -0.38372 | -0.38677 | 1.00000  | 0.41102  | -0.72304 | -0.74082 | 0.16528  | -0.63540 | 0.77172  | 0.13605  | 0.78152  | 0.88306                       | 0.75658  | -0.45488 | 0.73557  | 0.73370  |
| RDW                           | -0.19443 | -0.04365 | -0.30150 | 0.41102  | 1.00000  | -0.30474 | -0.39169 | 0.00880  | -0.34290 | 0.43056  | -0.10407 | 0.48859  | 0.49609                       | 0.74344  | -0.70229 | 0.78642  | -0.01427 |
| CHLO                          | 0.91843  | 0.58339  | 0.75144  | -0.72304 | -0.30474 | 1.00000  | 0.96351  | -0.44978 | 0.96433  | -0.96420 | -0.19217 | -0.92929 | -0.93735                      | -0.77675 | 0.32882  | -0.77102 | -0.82024 |
| PN                            | 0.82468  | 0.59590  | 0.78837  | -0.74082 | -0.39169 | 0.96351  | 1.00000  | -0.20777 | 0.98522  | -0.99715 | -0.23347 | -0.93010 | -0.94825                      | -0.86060 | 0.37088  | -0.78810 | -0.79334 |
| SC                            | -0.59521 | -0.19539 | -0.20598 | 0.16528  | 0.00880  | -0.44978 | -0.20777 | 1.00000  | -0.27087 | 0.21954  | -0.25592 | 0.29322  | 0.28308                       | 0.05495  | -0.06961 | 0.26438  | 0.22211  |
| TR                            | 0.83952  | 0.65266  | 0.83453  | -0.63540 | -0.34290 | 0.96433  | 0.98522  | -0.27087 | 1.00000  | -0.97488 | -0.16426 | -0.90263 | -0.89995                      | -0.81810 | 0.35422  | -0.73632 | -0.75575 |
| EL                            | -0.82643 | -0.56510 | -0.77453 | 0.77172  | 0.43056  | -0.96420 | -0.99715 | 0.21954  | -0.97488 | 1.00000  | 0.24358  | 0.95127  | 0.96784                       | 0.88249  | -0.41236 | 0.82522  | 0.80462  |
| LWP                           | 0.01796  | 0.49095  | -0.05833 | 0.13605  | -0.10407 | -0.19217 | -0.23347 | -0.25592 | -0.16426 | 0.24358  | 1.00000  | 0.23712  | 0.21081                       | 0.04938  | 0.35904  | 0.18391  | 0.43936  |
| MDA                           | -0.84326 | -0.49244 | -0.68140 | 0.78152  | 0.48859  | -0.92929 | -0.93010 | 0.29322  | -0.90263 | 0.95127  | 0.23712  | 1.00000  | 0.96903                       | 0.90516  | -0.58370 | 0.90047  | 0.82467  |
| H <sub>2</sub> O <sub>2</sub> | -0.82515 | -0.49041 | -0.69091 | 0.88306  | 0.49609  | -0.93735 | -0.94825 | 0.28308  | -0.89995 | 0.96784  | 0.21081  | 0.96903  | 1.00000                       | 0.89960  | -0.51105 | 0.88263  | 0.82389  |
| PRO                           | -0.67008 | -0.51498 | -0.63081 | 0.75658  | 0.74344  | -0.77675 | -0.86060 | 0.05495  | -0.81810 | 0.88249  | 0.04938  | 0.90516  | 0.89960                       | 1.00000  | -0.73903 | 0.92518  | 0.57609  |
| SOD                           | 0.36228  | 0.39713  | 0.31770  | -0.45488 | -0.70229 | 0.32882  | 0.37088  | -0.06961 | 0.35422  | -0.41236 | 0.35904  | -0.58370 | -0.51105                      | -0.73903 | 1.00000  | -0.66295 | -0.23354 |
| APX                           | -0.68777 | -0.27655 | -0.50317 | 0.73557  | 0.78642  | -0.77102 | -0.78810 | 0.26438  | -0.73632 | 0.82522  | 0.18391  | 0.90047  | 0.88263                       | 0.92518  | -0.66295 | 1.00000  | 0.54647  |
| CAT                           | -0.71293 | -0.37167 | -0.60882 | 0.73370  | -0.01427 | -0.82024 | -0.79334 | 0.22211  | -0.75575 | 0.80462  | 0.43936  | 0.82467  | 0.82389                       | 0.57609  | -0.23354 | 0.54647  | 1.00000  |

Plant height (PH), shoot fresh weight (SFW), shoot dry weight (SDW), root fresh weight (RFW), root dry weight (RDW), total chlorophyll (CHLO), net photosynthetic rate (PN), stomatal conductance (SC), transpiration rate (TR), electrolyte leakage (EL), leaf water potential (LWP), malondialdehyde (MDA), hydrogen peroxide (H<sub>2</sub>O<sub>2</sub>), proline (PRO), superoxide dismutase (SOD), ascorbate peroxidase (APX), and catalase (CAT).

**Table S9.** Correlation of morpho-physiological traits of eight wheat genotypes under SeNPs + drought conditions.

|                               | PH       | SFW      | RFW      | SDW      | RDW      | CHLO     | PN       | SC       | TR       | EL       | LWP      | MDA      | H <sub>2</sub> O <sub>2</sub> | PRO      | SOD      | APX      | CAT      |
|-------------------------------|----------|----------|----------|----------|----------|----------|----------|----------|----------|----------|----------|----------|-------------------------------|----------|----------|----------|----------|
| PH                            | 1.00000  | 0.81510  | 0.68413  | −0.66463 | −0.34823 | 0.89346  | 0.87462  | 0.91792  | 0.49658  | 0.05594  | 0.27322  | −0.89835 | 0.44099                       | −0.92281 | 0.52003  | −0.74487 | −0.81532 |
| SFW                           | 0.81510  | 1.00000  | 0.92320  | −0.64424 | −0.23260 | 0.82311  | 0.83661  | 0.83990  | 0.79627  | −0.12613 | −0.01878 | −0.77085 | 0.25762                       | −0.76034 | 0.35258  | −0.48117 | −0.77461 |
| RFW                           | 0.68413  | 0.92320  | 1.00000  | −0.35800 | −0.35297 | 0.80389  | 0.81939  | 0.81461  | 0.93326  | 0.05054  | 0.08592  | −0.74161 | 0.22398                       | −0.74691 | 0.44930  | −0.57703 | −0.64175 |
| SDW                           | −0.66463 | −0.64424 | −0.35800 | 1.00000  | 0.08185  | −0.38424 | −0.34846 | −0.42744 | −0.16095 | 0.56315  | −0.01057 | 0.42173  | −0.02241                      | 0.46055  | −0.29075 | 0.05672  | 0.51110  |
| RDW                           | −0.34823 | −0.23260 | −0.35297 | 0.08185  | 1.00000  | −0.49708 | −0.41055 | −0.44458 | −0.25735 | 0.20800  | −0.75609 | 0.44430  | −0.62911                      | 0.61132  | −0.39408 | 0.64296  | 0.19900  |
| CHLO                          | 0.89346  | 0.82311  | 0.80389  | −0.38424 | −0.49708 | 1.00000  | 0.99144  | 0.99296  | 0.63272  | 0.18736  | 0.37329  | −0.96862 | 0.63948                       | −0.95511 | 0.44096  | −0.85878 | −0.87609 |
| PN                            | 0.87462  | 0.83661  | 0.81939  | −0.34846 | −0.41055 | 0.99144  | 1.00000  | 0.98519  | 0.67739  | 0.22053  | 0.28423  | −0.95018 | 0.59375                       | −0.92216 | 0.40628  | −0.83345 | −0.86836 |
| SC                            | 0.91792  | 0.83990  | 0.81461  | −0.42744 | −0.44458 | 0.99296  | 0.98519  | 1.00000  | 0.63535  | 0.20917  | 0.37240  | −0.98420 | 0.56040                       | −0.96231 | 0.50978  | −0.84675 | −0.88633 |
| TR                            | 0.49658  | 0.79627  | 0.93326  | −0.16095 | −0.25735 | 0.63272  | 0.67739  | 0.63535  | 1.00000  | 0.04881  | −0.07988 | −0.52679 | 0.04958                       | −0.56840 | 0.38056  | −0.47549 | −0.37502 |
| EL                            | 0.05594  | −0.12613 | 0.05054  | 0.56315  | 0.20800  | 0.18736  | 0.22053  | 0.20917  | 0.04881  | 1.00000  | 0.06874  | −0.24778 | 0.10273                       | −0.11097 | 0.10657  | −0.40196 | −0.17755 |
| LWP                           | 0.27322  | −0.01878 | 0.08592  | −0.01057 | −0.75609 | 0.37329  | 0.28423  | 0.37240  | −0.07988 | 0.06874  | 1.00000  | −0.48114 | 0.41595                       | −0.54337 | 0.64613  | −0.60701 | −0.22533 |
| MDA                           | −0.89835 | −0.77085 | −0.74161 | 0.42173  | 0.44430  | −0.96862 | −0.95018 | −0.98420 | −0.52679 | −0.24778 | −0.48114 | 1.00000  | −0.55478                      | 0.95834  | −0.56680 | 0.84575  | 0.90183  |
| H <sub>2</sub> O <sub>2</sub> | 0.44099  | 0.25762  | 0.22398  | −0.02241 | −0.62911 | 0.63948  | 0.59375  | 0.56040  | 0.04958  | 0.10273  | 0.41595  | −0.55478 | 1.00000                       | −0.55967 | −0.14467 | −0.62951 | −0.57763 |
| PRO                           | −0.92281 | −0.76034 | −0.74691 | 0.46055  | 0.61132  | −0.95511 | −0.92216 | −0.96231 | −0.56840 | −0.11097 | −0.54337 | 0.95834  | −0.55967                      | 1.00000  | −0.64025 | 0.89765  | 0.78016  |
| SOD                           | 0.52003  | 0.35258  | 0.44930  | −0.29075 | −0.39408 | 0.44096  | 0.40628  | 0.50978  | 0.38056  | 0.10657  | 0.64613  | −0.56680 | −0.14467                      | −0.64025 | 1.00000  | −0.57658 | −0.23576 |
| APX                           | −0.74487 | −0.48117 | −0.57703 | 0.05672  | 0.64296  | −0.85878 | −0.83345 | −0.84675 | −0.47549 | −0.40196 | −0.60701 | 0.84575  | −0.62951                      | 0.89765  | −0.57658 | 1.00000  | 0.58749  |
| CAT                           | −0.81532 | −0.77461 | −0.64175 | 0.51110  | 0.19900  | −0.87609 | −0.86836 | −0.88633 | −0.37502 | −0.17755 | −0.22533 | 0.90183  | −0.57763                      | 0.78016  | −0.23576 | 0.58749  | 1.00000  |

Plant height (PH), shoot fresh weight (SFW), shoot dry weight (SDW), root fresh weight (RFW), root dry weight (RDW), total chlorophyll (CHLO), net photosynthetic rate (PN), stomatal conductance (SC), transpiration rate (TR), electrolyte leakage (EL), leaf water potential (LWP), malondialdehyde (MDA), hydrogen peroxide (H<sub>2</sub>O<sub>2</sub>), proline (PRO), superoxide dismutase (SOD), ascorbate peroxidase (APX), and catalase (CAT).

**Table S10.** Correlation of morpho-physiological traits of eight wheat genotypes under heat conditions.

|                               | PH       | SFW      | RFW      | SDW      | RDW      | CHLO     | PN       | SC       | TR       | EL       | LWP      | MDA      | H <sub>2</sub> O <sub>2</sub> | PRO      | SOD      | APX      | CAT      |
|-------------------------------|----------|----------|----------|----------|----------|----------|----------|----------|----------|----------|----------|----------|-------------------------------|----------|----------|----------|----------|
| PH                            | 1.00000  | 0.41020  | 0.29064  | −0.81010 | −0.32359 | 0.62131  | 0.69822  | 0.47283  | 0.70295  | 0.56905  | −0.13721 | −0.77552 | −0.54749                      | −0.74153 | 0.52001  | −0.76743 | 0.03430  |
| SFW                           | 0.41020  | 1.00000  | 0.86411  | −0.54192 | −0.47704 | 0.85210  | 0.80755  | 0.87771  | 0.81136  | 0.49388  | −0.56849 | −0.73156 | −0.82681                      | −0.69071 | 0.36611  | −0.73134 | −0.80738 |
| RFW                           | 0.29064  | 0.86411  | 1.00000  | −0.50084 | −0.41041 | 0.90000  | 0.84215  | 0.94077  | 0.83535  | 0.53686  | −0.64756 | −0.76709 | −0.90122                      | −0.68870 | 0.29063  | −0.70880 | −0.93557 |
| SDW                           | −0.81010 | −0.54192 | −0.50084 | 1.00000  | 0.08042  | −0.68924 | −0.68083 | −0.61518 | −0.70247 | −0.47604 | 0.57806  | 0.64534  | 0.56314                       | 0.58309  | −0.48176 | 0.62897  | 0.25288  |
| RDW                           | −0.32359 | −0.47704 | −0.41041 | 0.08042  | 1.00000  | −0.35385 | −0.44198 | −0.33370 | −0.35352 | −0.54053 | −0.34627 | 0.56983  | 0.52057                       | 0.77003  | −0.75475 | 0.41282  | 0.28619  |
| CHLO                          | 0.62131  | 0.85210  | 0.90000  | −0.68924 | −0.35385 | 1.00000  | 0.98428  | 0.97806  | 0.96181  | 0.69105  | −0.63884 | −0.91772 | −0.96399                      | −0.80047 | 0.26189  | −0.93248 | −0.73583 |
| PN                            | 0.69822  | 0.80755  | 0.84215  | −0.68083 | −0.44198 | 0.98428  | 1.00000  | 0.94641  | 0.94620  | 0.78164  | −0.52653 | −0.95580 | −0.97481                      | −0.86650 | 0.31791  | −0.97119 | −0.64459 |
| SC                            | 0.47283  | 0.87771  | 0.94077  | −0.61518 | −0.33370 | 0.97806  | 0.94641  | 1.00000  | 0.89458  | 0.69094  | −0.71426 | −0.83647 | −0.96295                      | −0.72327 | 0.19216  | −0.86540 | −0.83752 |
| TR                            | 0.70295  | 0.81136  | 0.83535  | −0.70247 | −0.35352 | 0.96181  | 0.94620  | 0.89458  | 1.00000  | 0.54703  | −0.52831 | −0.94559 | −0.88774                      | −0.81368 | 0.32811  | −0.92182 | −0.63441 |
| EL                            | 0.56905  | 0.49388  | 0.53686  | −0.47604 | −0.54053 | 0.69105  | 0.78164  | 0.69094  | 0.54703  | 1.00000  | −0.24561 | −0.71117 | −0.81093                      | −0.76442 | 0.32812  | −0.76274 | −0.35560 |
| LWP                           | −0.13721 | −0.56849 | −0.64756 | 0.57806  | −0.34627 | −0.63884 | −0.52653 | −0.71426 | −0.52831 | −0.24561 | 1.00000  | 0.30641  | 0.51385                       | 0.09843  | 0.22563  | 0.41496  | 0.67827  |
| MDA                           | −0.77552 | −0.73156 | −0.76709 | 0.64534  | 0.56983  | −0.91772 | −0.95580 | −0.83647 | −0.94559 | −0.71117 | 0.30641  | 1.00000  | 0.91311                       | 0.93908  | −0.47216 | 0.94946  | 0.52057  |
| H <sub>2</sub> O <sub>2</sub> | −0.54749 | −0.82681 | −0.90122 | 0.56314  | 0.52057  | −0.96399 | −0.97481 | −0.96295 | −0.88774 | −0.81093 | 0.51385  | 0.91311  | 1.00000                       | 0.85575  | −0.31186 | 0.91498  | 0.75011  |
| PRO                           | −0.74153 | −0.69071 | −0.68870 | 0.58309  | 0.77003  | −0.80047 | −0.86650 | −0.72327 | −0.81368 | −0.76442 | 0.09843  | 0.93908  | 0.85575                       | 1.00000  | −0.68115 | 0.84505  | 0.43073  |
| SOD                           | 0.52001  | 0.36611  | 0.29063  | −0.48176 | −0.75475 | 0.26189  | 0.31791  | 0.19216  | 0.32811  | 0.32812  | 0.22563  | −0.47216 | −0.31186                      | −0.68115 | 1.00000  | −0.24585 | −0.07675 |
| APX                           | −0.76743 | −0.73134 | −0.70880 | 0.62897  | 0.41282  | −0.93248 | −0.97119 | −0.86540 | −0.92182 | −0.76274 | 0.41496  | 0.94946  | 0.91498                       | 0.84505  | −0.24585 | 1.00000  | 0.49283  |
| CAT                           | 0.03430  | −0.80738 | −0.93557 | 0.25288  | 0.28619  | −0.73583 | −0.64459 | −0.83752 | −0.63441 | −0.35560 | 0.67827  | 0.52057  | 0.75011                       | 0.43073  | −0.07675 | 0.49283  | 1.00000  |

Plant height (PH), shoot fresh weight (SFW), shoot dry weight (SDW), root fresh weight (RFW), root dry weight (RDW), total chlorophyll (CHLO), net photosynthetic rate (PN), stomatal conductance (SC), transpiration rate (TR), electrolyte leakage (EL), leaf water potential (LWP), malondialdehyde (MDA), hydrogen peroxide (H<sub>2</sub>O<sub>2</sub>), proline (PRO), superoxide dismutase (SOD), ascorbate peroxidase (APX), and catalase (CAT).

**Table S11.** Correlation of morpho-physiological traits of eight wheat genotypes under SeNPs + heat conditions.

|                               | PH       | SFW      | RFW      | SDW      | RDW      | CHLO     | PN       | SC       | TR       | EL       | LWP      | MDA      | H <sub>2</sub> O <sub>2</sub> | PRO      | SOD      | APX      | CAT      |
|-------------------------------|----------|----------|----------|----------|----------|----------|----------|----------|----------|----------|----------|----------|-------------------------------|----------|----------|----------|----------|
| PH                            | 1.00000  | 0.30485  | 0.79293  | −0.67392 | −0.51700 | 0.84743  | 0.08440  | 0.93787  | 0.86392  | −0.94662 | −0.49112 | −0.92180 | −0.82216                      | −0.94853 | −0.46490 | −0.86292 | −0.47287 |
| SFW                           | 0.30485  | 1.00000  | 0.53435  | −0.43452 | 0.50753  | 0.02280  | 0.15373  | 0.35985  | 0.60079  | −0.19518 | −0.45598 | −0.35278 | −0.26445                      | −0.01606 | −0.20764 | −0.19336 | −0.58270 |
| RFW                           | 0.79293  | 0.53435  | 1.00000  | −0.41852 | −0.33463 | 0.52013  | 0.14794  | 0.87278  | 0.81284  | −0.80711 | −0.58060 | −0.76637 | −0.55350                      | −0.71350 | −0.04919 | −0.69497 | −0.50202 |
| SDW                           | −0.67392 | −0.43452 | −0.41852 | 1.00000  | 0.17789  | −0.44156 | 0.02388  | −0.53002 | −0.64030 | 0.49808  | 0.43255  | 0.46664  | 0.47558                       | 0.52246  | 0.73818  | 0.29442  | 0.40634  |
| RDW                           | −0.51700 | 0.50753  | −0.33463 | 0.17789  | 1.00000  | −0.38718 | 0.28919  | −0.37376 | −0.17391 | 0.50204  | −0.17911 | 0.29066  | 0.45820                       | 0.74467  | −0.06911 | 0.36308  | −0.24914 |
| CHLO                          | 0.84743  | 0.02280  | 0.52013  | −0.44156 | −0.38718 | 1.00000  | 0.30156  | 0.86479  | 0.66677  | −0.90724 | −0.55843 | −0.91186 | −0.64618                      | −0.83392 | −0.53458 | −0.90720 | −0.46749 |
| PN                            | 0.08440  | 0.15373  | 0.14794  | 0.02388  | 0.28919  | 0.30156  | 1.00000  | 0.30172  | 0.33692  | −0.29602 | −0.68715 | −0.23233 | −0.02971                      | −0.01442 | −0.23013 | −0.28365 | 0.09209  |
| SC                            | 0.93787  | 0.35985  | 0.87278  | −0.53002 | −0.37376 | 0.86479  | 0.30172  | 1.00000  | 0.86069  | −0.97690 | −0.68655 | −0.95427 | −0.68953                      | −0.86971 | −0.35701 | −0.89790 | −0.56708 |
| TR                            | 0.86392  | 0.60079  | 0.81284  | −0.64030 | −0.17391 | 0.66677  | 0.33692  | 0.86069  | 1.00000  | −0.84071 | −0.70145 | −0.85007 | −0.65945                      | −0.70923 | −0.54559 | −0.79867 | −0.41534 |
| EL                            | −0.94662 | −0.19518 | −0.80711 | 0.49808  | 0.50204  | −0.90724 | −0.29602 | −0.97690 | −0.84071 | 1.00000  | 0.63443  | 0.94578  | 0.70008                       | 0.92543  | 0.39937  | 0.93204  | 0.42606  |
| LWP                           | −0.49112 | −0.45598 | −0.58060 | 0.43255  | −0.17911 | −0.55843 | −0.68715 | −0.68655 | −0.70145 | 0.63443  | 1.00000  | 0.61403  | 0.08412                       | 0.32368  | 0.52264  | 0.54852  | 0.47369  |
| MDA                           | −0.92180 | −0.35278 | −0.76637 | 0.46664  | 0.29066  | −0.91186 | −0.23233 | −0.95427 | −0.85007 | 0.94578  | 0.61403  | 1.00000  | 0.71332                       | 0.83742  | 0.43873  | 0.96639  | 0.61150  |
| H <sub>2</sub> O <sub>2</sub> | −0.82216 | −0.26445 | −0.55350 | 0.47558  | 0.45820  | −0.64618 | −0.02971 | −0.68953 | −0.65945 | 0.70008  | 0.08412  | 0.71332  | 1.00000                       | 0.80481  | 0.23421  | 0.68912  | 0.22067  |
| PRO                           | −0.94853 | −0.01606 | −0.71350 | 0.52246  | 0.74467  | −0.83392 | −0.01442 | −0.86971 | −0.70923 | 0.92543  | 0.32368  | 0.83742  | 0.80481                       | 1.00000  | 0.31202  | 0.83102  | 0.27899  |
| SOD                           | −0.46490 | −0.20764 | −0.04919 | 0.73818  | −0.06911 | −0.53458 | −0.23013 | −0.35701 | −0.54559 | 0.39937  | 0.52264  | 0.43873  | 0.23421                       | 0.31202  | 1.00000  | 0.37563  | 0.25617  |
| APX                           | −0.86292 | −0.19336 | −0.69497 | 0.29442  | 0.36308  | −0.90720 | −0.28365 | −0.89790 | −0.79867 | 0.93204  | 0.54852  | 0.96639  | 0.68912                       | 0.83102  | 0.37563  | 1.00000  | 0.43205  |
| CAT                           | −0.47287 | −0.58270 | −0.50202 | 0.40634  | −0.24914 | −0.46749 | 0.09209  | −0.56708 | −0.41534 | 0.42606  | 0.47369  | 0.61150  | 0.22067                       | 0.27899  | 0.25617  | 0.43205  | 1.00000  |

Plant height (PH), shoot fresh weight (SFW), shoot dry weight (SDW), root fresh weight (RFW), root dry weight (RDW), total chlorophyll (CHLO), net photosynthetic rate (PN), stomatal conductance (SC), transpiration rate (TR), electrolyte leakage (EL), leaf water potential (LWP), malondialdehyde (MDA), hydrogen peroxide (H<sub>2</sub>O<sub>2</sub>), proline (PRO), superoxide dismutase (SOD), ascorbate peroxidase (APX), and catalase (CAT).
